1 **Title**

2 A molecular mechanism for salt stress-induced microtubule array formation in Arabidopsis

3

4 **Authors**

5 Christopher Kesten<sup>1,2,3\*</sup>, Arndt Wallmann<sup>4\*</sup>, René Schneider<sup>2,3</sup>, Heather E. McFarlane<sup>2</sup>, Anne  
6 Diehl<sup>4</sup>, Ghazanfar Abbas Khan<sup>2</sup>, Barth-Jan van Rossum<sup>4</sup>, Edwin Lampugnani<sup>2</sup>, Nils Cremer<sup>4</sup>,  
7 Peter Schmieder<sup>4</sup>, Kristina L. Ford<sup>2</sup>, Florian Seiter<sup>4</sup>, Joshua L. Heazlewood<sup>2</sup>, Clara Sanchez-  
8 Rodriguez<sup>1</sup>, Hartmut Oschkinat<sup>4#</sup>, Staffan Persson<sup>2,3#</sup>

9

10 **Affiliations**

11 <sup>1</sup>Department of Biology, ETH Zurich, 8092 Zurich, Switzerland

12 <sup>2</sup>School of Biosciences, University of Melbourne, Parkville 3010, Victoria, Australia

13 <sup>3</sup>Max-Planck-Institute of Molecular Plant Physiology, Am Mühlenberg 1, 14476 Potsdam-  
14 Golm, Germany

15 <sup>4</sup>Leibniz-Forschungsinstitut für Molekulare Pharmakologie (FMP), NMR-supported  
16 Structural Biology, Robert-Rössle-Str. 10, 13125, Berlin, Germany

17

18

19

20 \*Co-first author

21

22 #Corresponding authors:

23 Staffan Persson,

24 School of Biosciences,

25 Parkville, VIC 3010, Melbourne,

26 Australia

27

28 Email: Staffan.persson@unimelb.edu.au

29

30 Hartmut Oschkinat,

31 Leibniz-Forschungsinstitut für Molekulare Pharmakologie (FMP),

32 NMR-supported Structural Biology,

33 Robert-Rössle-Str. 10, 13125, Berlin,

34 Germany

35

36 Email: oschkinat@fmp-berlin.de

37

38

39

40

41

42

43

## 44 **Abstract**

45 Microtubules are filamentous structures necessary for cell division, motility and morphology,  
46 with dynamics critically regulated by microtubule-associated proteins (MAPs). We outline  
47 the molecular mechanism by which the MAP, COMPANION OF CELLULOSE  
48 SYNTHASE1 (CC1), controls microtubule bundling and dynamics to sustain plant growth  
49 under salt stress. CC1 contains an intrinsically disordered N-terminus that links microtubules  
50 at evenly distributed distances through four conserved hydrophobic regions. NMR analyses  
51 revealed that two neighboring residues in the first hydrophobic binding motif are crucial for  
52 the microtubule interaction, which we confirmed through live cell analyses. The microtubule-  
53 binding mechanism of CC1 is remarkably similar to that of the prominent neuropathology-  
54 related protein Tau, indicating evolutionary convergence of MAP functions across animal and  
55 plant cells.

56

## 57 **Introduction**

58 Microtubules are tubular structures essential to morphogenesis, division and motility in  
59 eukaryotic cells <sup>1</sup>. While animal cells typically contain a centrosome with radiating  
60 microtubules toward the cell periphery, growing plant cells arrange their microtubules along  
61 the cell cortex <sup>2</sup>. A major function of the cortical microtubules in plant cells is to direct the  
62 synthesis of cellulose, a fundamental component of the cell wall essential to plant  
63 morphology <sup>3</sup>. Cellulose is produced at the plasma membrane by Cellulose Synthase (CESA)  
64 protein complexes (CSCs; <sup>4</sup>) that display catalytically-driven motility along the membrane <sup>3</sup>.  
65 The recently described microtubule-associated protein (MAP), Companion of Cellulose  
66 Synthase1 (CC1), is an integral component of the CSC and sustains cellulose synthesis by  
67 promoting the formation of a stress-tolerant microtubule array during salt stress <sup>5</sup>. As  
68 cellulose synthesis is key for plant growth, engineering of plants to better produce cellulose is  
69 of utmost importance to agriculture. Indeed, understanding the molecular mechanism by  
70 which CC1 controls cellulose synthesis may bear opportunities to improve cultivation on salt-  
71 affected lands.

72 The microtubule network is highly dynamic, and its state is influenced by the action  
73 of MAPs. The mammalian Tau/MAP2/MAP4 family represents the most investigated MAP  
74 set, primarily due to Tau's importance in the pathology of neurodegenerative diseases <sup>6-8</sup>. *In*  
75 *vitro*, Tau promotes polymerization and bundling of microtubules, and diffuses along the  
76 microtubule lattice <sup>9-11</sup>. In the brain, Tau is predominantly located at the axons of neurons,  
77 where it contributes to the microtubule organization that drives neurite outgrowth <sup>12,13</sup>. In  
78 disease, Tau self-aggregates into neurofibrillary tangles that might trigger neurodegeneration  
79 <sup>14</sup>. Intriguingly, no clear homologs of the Tau/MAP2/MAP4 family have been identified in  
80 plants <sup>15,16</sup>. Because the full scope of Tau's biological role remains elusive, identification of  
81 Tau-related proteins outside the animal Kingdom would benefit our understanding of how  
82 this class of MAPs functions.

83

## 84 **The N-terminus of CC1 Links Microtubules at Evenly Distributed Distances and** 85 **Bundles Microtubules**

86 The cytosolic N-terminal part of CC1 (residues 1-120, CC1 $\Delta$ C223) binds to microtubules and  
87 restores microtubule re-assembly, cellulose synthesis and wild-type growth of *cc1cc2* (null-

88 mutation in CC1 and its closest homolog CC2) seedlings on high levels of salt<sup>5</sup>. These data  
89 indicate that CC1 $\Delta$ C223 is critical to CC1's function during stress, and we therefore set out  
90 to investigate the molecular details of how it interacts with microtubules. We cross-linked  
91 6xHis-tagged CC1 $\Delta$ C223 with  $\alpha$ - $\beta$ -tubulin dimers using 1-ethyl-3-(3-dimethylaminopropyl)  
92 carbodiimide hydrochloride (EDC)<sup>17</sup>, which led to di- and multimeric protein products (Fig.  
93 1A and Fig. S1A). LC/MS/MS analysis revealed five well-defined covalent bonds between  
94 CC1 $\Delta$ C223 and  $\alpha$ - or  $\beta$ -tubulin (Fig. 1B). We consistently detected four peptides of  
95 CC1 $\Delta$ C223 cross-linked to  $\beta$ -tubulin (K<sup>40</sup> to E<sup>111</sup>, K<sup>94</sup> to E<sup>111</sup>, K<sup>96</sup> to E<sup>111</sup> and K<sup>96</sup> to E<sup>158</sup>;  
96 letters and numbers indicate amino acids in CC1 $\Delta$ C223 and  $\beta$ -tubulin, respectively; Fig. 1, B  
97 to C; Table S1). Notably, the three sequentially distant K<sup>40</sup> and K<sup>94/96</sup> of CC1 $\Delta$ C223 cross-  
98 linked to the same residue on  $\beta$ -tubulin (E<sup>111</sup>). This suggests that two CC1 regions might bind  
99 the same sites on two different  $\beta$ -tubulin molecules, which is corroborated by the multimeric  
100 protein products in the SDS page. The cross-linked position on  $\alpha$ -tubulin is close to the  
101 hydrophobic interface between tubulin heterodimers, a site that is frequently occupied by  
102 agents that directly regulate microtubule formation such as vinblastine, the stathmin-like  
103 domain (SLD) of RB3, and also by Tau<sup>18-20</sup> (Figs. S1B and C).

104 To further investigate how CC1 $\Delta$ C223 binds microtubules, we co-polymerized  
105 tubulin in the presence of CC1 $\Delta$ C223. We then labeled CC1 $\Delta$ C223 using 5 nm gold-  
106 conjugates that recognize the His-tag<sup>21</sup> and monitored the formed microtubules and gold  
107 distribution *via* transmission electron microscopy (TEM). Gold labeling only occurred at  
108 closely aligned microtubules with very small inter-microtubule distances (Fig. 1, D and E;  
109 Fig. S1D), and occurred as evenly distributed distances in straight rows along interphases of  
110 two neighboring microtubules (Fig. 1, D and E). The gold particles were typically spaced by  
111 10 nm (Fig. 1F; 10.0 nm  $\pm$  2.4 nm; mean  $\pm$  SD; three independent experiments; N = 1785  
112 labels). The number of gold-labels in a given row ranged between two and 41 labels (Fig. 1G;  
113 8  $\pm$  5 labels; mean  $\pm$  SD; three independent replicates; N = 274 rows), making each row  
114 about 80 nm in length. We also observed multiple gold-labeled rows on one microtubule  
115 when in close proximity to several other microtubules (Fig. 1E). The angles between gold-  
116 labeled rows were small (Fig. 1H; 2.8°  $\pm$  3°; mean  $\pm$  SD; three independent replicates; N =  
117 98 rows), highlighting that the labeling did not shift between neighboring protofilaments on  
118 the same microtubule. These data indicate that CC1 $\Delta$ C223 promotes microtubule bundling.  
119 Indeed, increasing levels of CC1 $\Delta$ C223 correlated with increased microtubule bundling in  
120 TEM experiments (Fig. 2, A to C; Fig. S2, A and B).

121

### 122 **The N-terminus of CC1 can Diffuse Along the Microtubule Lattice**

123 As our TEM experiments only provide static information on the interactions between  
124 CC1 $\Delta$ C223 and microtubules, we labelled the sole sulfhydryl group (C<sup>116</sup>) in CC1 $\Delta$ C223  
125 with the green fluorescent dye CF488A-maleimide (Fig. S2C) and performed rhodamine-  
126 labeled microtubule interaction assays<sup>22</sup>. Using total internal reflection fluorescence  
127 microscopy, we observed most of the CF488A-labeled CC1 $\Delta$ C223 proteins as fluorescent  
128 foci associated with microtubules (Fig. 2C; Movie S1). CF488A-labeled CC1 $\Delta$ C223 diffused  
129 bidirectionally along the rhodamine-labeled microtubules and occurred on both single and  
130 bundled microtubules (Fig. 2D). The mean square displacement (0.076  $\pm$  0.005  $\mu$ m<sup>2</sup>/s; mean  
131  $\pm$  S.D.; N = 50 molecules) of fluorescent foci exhibited a linear relationship with time (Fig.

132 S2, E and F), indicating free diffusion. In accordance with the results above, CF488A-labeled  
133 foci occupied bundled microtubules for a longer time than single microtubules (Fig. 2E; fig.  
134 S2, D and E). These data are reminiscent to that of Tau, which promotes microtubule-  
135 bundling and polymerization, and also moves along microtubules *in vitro* with comparable  
136 diffusion coefficients ( $0.142 - 0.292 \mu\text{m}^2/\text{s}$ ; <sup>10</sup>).

137

### 138 **The N-terminus of CC1 is Intrinsically Unstructured and Engages with Microtubules** 139 **through Four Hydrophobic Motifs**

140 To understand how CC1 $\Delta$ C223 engages with microtubules, we assessed its structural features  
141 using solution state NMR, circular dichroism spectroscopy (CD) and analytical  
142 ultracentrifugation (AUC). The 2D <sup>1</sup>H-<sup>15</sup>N-heteronuclear single quantum coherence spectrum  
143 of <sup>15</sup>N-labeled CC1 $\Delta$ C223 showed narrow signals and poor chemical shift dispersion in the  
144 <sup>1</sup>H dimension, which is characteristic for intrinsically disordered proteins (Fig. 3A). For the  
145 sequence-specific assignment, we used a combination of three-dimensional and four-  
146 dimensional experiments with non-uniform sampling to assign ~85 % of the backbone  
147 resonances. The disordered nature of CC1 $\Delta$ C223 was supported *via* multiple sequence data  
148 analysis algorithms and CD measurements (Fig. S3 A, Fig. 3 B). AUC analysis revealed only  
149 elongated monomeric forms of the protein in solution (Fig. 3C). Secondary structure  
150 propensities were estimated by generating chemical shift indices (CSI). For this purpose,  
151 experimental C $\alpha$  and C $\beta$  chemical shifts were subtracted from the respective random coil  
152 values for each amino acid type. The resulting CSI revealed few and rather scattered  
153 deviations from random coil values (Figure 3D). Moreover, the uniform and fast dynamics  
154 and chemical shift indices of CC1 $\Delta$ C223 are consistent with a disordered, highly dynamic  
155 and monomeric state in solution (Fig. S3, B to D), similar to the members of the  
156 Tau/MAP2/MAP4 family.

157 To study CC1 $\Delta$ C223-microtubule interactions in a residue-specific manner, we  
158 recorded <sup>1</sup>H-<sup>15</sup>N HSQC spectra of <sup>15</sup>N-labeled CC1 $\Delta$ C223 in the presence and absence of  
159 paclitaxel-stabilized microtubules. We observed line broadening and vanishing of individual  
160 cross-peaks when microtubules were added (Fig. 4, A and B). The effects of the microtubules  
161 on the transverse relaxation rate ( $\Delta R_2$ ) of CC1 $\Delta$ C223 signals were reversible, independent of  
162 the magnetic field, residue specific, did not correlate with the chemical shift changes, and  
163 relaxation dispersion experiments did not show contributions of intermediate exchange (Fig.  
164 S4, A to G). To conclude, the line broadening is a direct result of CC1 $\Delta$ C223-microtubule  
165 complex formation. Figure 4C shows the intensity ratios of cross-peaks taken from 3D  
166 HNCA spectra of <sup>15</sup>N,<sup>13</sup>C-labeled CC1 $\Delta$ C223 in the presence and the absence of  
167 microtubules ( $I_{\text{bound}}/I_{\text{free}}$ ) per residue. A significant intensity decrease is observed in four  
168 regions, comprising residues <sup>23</sup>RPVYYVQS<sup>30</sup>, <sup>45</sup>FHSTPVLSPM<sup>54</sup>, <sup>74</sup>FSGSLKPG<sup>83</sup> and  
169 <sup>103</sup>QWKECAVI<sup>110</sup> (Fig. 4C). Due to signal overlap, the region between residues 60 and 80 is  
170 not well covered. We found a clear correlation between the NMR-based microtubule-  
171 interaction profile and the hydrophobicity pattern of CC1 $\Delta$ C223, highlighting the role of  
172 hydrophobic interactions (Fig. 4D). The binding motifs are separated by stretches of mobile  
173 residues, presumably acting as linkers that are likely to retain a high degree of flexibility thus  
174 facilitating a highly dynamic interaction with microtubules. This binding behavior is  
175 reminiscent to that of Tau <sup>23</sup>, and the microtubule-binding regions of CC1 $\Delta$ C223 also share

176 remarkable similarities in hydrophobicity, size, sequence, and spacing with those of the  
177 microtubule-binding regions of Tau(201-320) (Fig. 4E and Fig. S4H).

178

### 179 **Two Neighboring Tyrosine Residues in the N-terminus of CC1 Contribute to the** 180 **Microtubule Binding**

181 Microtubule binding of the four regions individually was investigated by Saturation Transfer  
182 Difference (STD) NMR measurements (Fig. S5A). The peptides CC1(16-38), CC1(41-64),  
183 CC1(65-85) and a positive control peptide Tau(211-242) yielded strong STD intensities in the  
184 amide and aromatic regions of the <sup>1</sup>H spectrum (Fig. S5, B to E). No significant STD effects  
185 were observed for a negative control peptide, CC1(83-103), corresponding to the third poorly  
186 conserved linker region, and for the most C-terminal region CC1(100-114) (Fig. S5, F and  
187 G). Targeting the N-terminal binding site, the exchange of <sup>26</sup>YY<sup>27</sup> to alanine in a  
188 CC1YYAA(16-38) peptide resulted in a substantially reduced STD profile, corroborating a  
189 contribution of these aromatic rings to the interaction (Fig. S5H). Indeed, the same mutation  
190 in CC1ΔC223 resulted in significantly reduced signal broadening of residues in the N-  
191 terminal region, while the intensity ratios for the C-terminal part remained similar to the  
192 wild-type protein (Fig. 3F). Likewise, the mutated CC1ΔC223 bound to microtubules with a  
193 lower affinity compared to the wild-type sequence in microtubule spin down assays (Fig. S5,  
194 I and J), corroborating an important function of the two tyrosine residues in microtubule  
195 binding.

196

### 197 **Mutations of the Two Microtubule-Interacting Tyrosine Residues in CC1 Impair** 198 **Microtubule-guided CESA Movement and Ability of Plants to Grow on Salt**

199 To assess how mutations in the two microtubule-binding tyrosine residues affect the function  
200 of CC1 *in vivo*, we mutated them to alanine in the full-length CC1 (CC1YYAA), fused it N-  
201 terminally with GFP, and transformed it into *Arabidopsis thaliana cc1cc2* mutant plants. The  
202 *cc1cc2* mutant seedlings display reduced growth and crystalline cellulose content on salt-  
203 containing media <sup>5</sup>. These phenotypes were not restored in *cc1cc2* GFP-CC1YYAA seedlings  
204 when grown on salt-containing media as compared to controls (Fig. 5, A to C) Spinning-disc  
205 confocal microscopy showed GFP-CC1YYAA signals as distinct foci at the plasma  
206 membrane (Movie S2) and within cytoplasmic compartments in dark-grown *Arabidopsis*  
207 hypocotyl cells, in accordance with reports on GFP-CC1 <sup>5</sup>; Fig. S6, A to C). GFP-CC1 co-  
208 localizes and migrates with tdTomato(tdT)-CESA6, which is an important subunit of the CSC  
209 <sup>24</sup>, at the plasma membrane <sup>5</sup>. Notably, the GFP-CC1YYAA also co-migrated with tdT-  
210 CESA6 at the plasma membrane (Fig. S6, A to E) (Pearson correlation coefficient  $r = 0.74 \pm$   
211  $0.06$ ; 6 cells from 6 seedlings and 3 biological replicates). However, in contrast to GFP-CC1,  
212 the migration of GFP-CC1YYAA was largely independent of cortical microtubules (mCherry  
213 (mCh)-TUA5; <sup>25</sup>; Fig. 5, D to F). This indicates that reduced microtubule binding of GFP-  
214 CC1YYAA either directly affects the ability of CSCs to engage with microtubules, or that the  
215 microtubule array is mis-regulated and cannot fulfil its guiding function anymore.

216

217 To investigate if the CC1YYAA can sustain microtubule and CSC function during  
218 salt exposure, we exposed seedlings to 200 mM salt and recorded time series of microtubule  
219 (mCh-TUA5) and CC1 (GFP-CC1 or GFP-CC1YYAA) behavior (Fig. S6F). The GFP-CC  
219 proteins (either GFP-CC1 or GFP-CC1YYAA) were considered as proxy for the CSC

220 behavior because they co-localize and migrate together with tdT-CESA6. In agreement with  
221 <sup>5</sup>, the microtubule array and cellulose synthesis were restored within 28 hours of salt  
222 exposure in the GFP-CC1-complemented *cc1cc2* seedlings (Fig. 5G). However, the *cc1cc2*  
223 GFP-CC1YYAA-complemented seedlings largely mimicked the *cc1cc2* mutant seedlings and  
224 failed to restore the microtubule array and cellulose synthesis during the course of the  
225 experiment (Fig. 5G). Interestingly, while the *cc1cc2* GFP-CC1 line showed increased  
226 microtubule bundling of the salt-adjusted microtubule array, the *cc1cc2* GFP-CC1YYAA  
227 cells failed to do so (Fig. 5F). Furthermore, the microtubule dynamics differed in the GFP-  
228 CC1 and GFP-CC1YYAA cell lines (Fig. S6, G and H), indicating that the microtubule  
229 dynamics and bundling are key to build a salt-tolerant microtubule array. Hence, the YY-  
230 containing region of CC1 is necessary to sustain microtubule array organization and cellulose  
231 synthesis during salt stress.

232

### 233 Discussion

234 Abiotic stress, such as soil salinity, substantially impacts plant growth <sup>26</sup> and thus  
235 dramatically compromises global agricultural productivity (~50-80 % loss in yield; <sup>27,28</sup>).  
236 Unravelling molecular mechanisms that can be used to engineer plants for better stress  
237 tolerance is therefore of urgent importance. We propose that the microtubule-binding regions  
238 of CC1 interact transiently with tubulin heterodimers, promoting polymerization by  
239 increasing the local tubulin concentration, stabilizing, and bundling microtubules, which  
240 would support the formation of a stress-stable microtubule array. The hydrophobic  
241 interactions of the CC1-microtubule complex could permit a more robust binding under  
242 conditions of high ionic strength, corroborating the importance of the protein's function  
243 during salt stress. The two tyrosine residues in the most N-terminal microtubule-binding  
244 region of CC1 are key to the microtubule binding, both *in vitro* and *in vivo*. Mutations in  
245 these residues disrupted microtubule-guided CSC movement and led to failure in the  
246 generation of a stress-tolerant microtubule array.

247 Our results show that CC1 $\Delta$ C223 functions remarkably similar to Tau. Both are  
248 intrinsically disordered proteins that can diffuse bidirectionally along the microtubule lattice  
249 <sup>10,23</sup>. A Tau fragment encompassing the four NMR-derived microtubule binding regions  
250 (Tau(208-324); TauF4) joins microtubules wall-to-wall similar to that of CC1 $\Delta$ C223 <sup>29</sup>. In-  
251 depth NMR studies using TauF4 <sup>30</sup>, and cryo-EM studies on full-length Tau <sup>8</sup>, proposed that  
252 Tau spans multiple tubulin heterodimers along the microtubule principal axis when bound to  
253 microtubules. The equivalence of cross-linked positions on  $\alpha$ -tubulin and the longitudinal  
254 decoration in the gold-labeling experiments suggest a similar interaction of CC1 $\Delta$ C223 with  
255 microtubules <sup>18</sup>. The functional and structural analogies between Tau and CC1 are further  
256 reflected in the fact that both Tau and CC1 are relevant for the organism to function during  
257 stress conditions; CC1 promotes cellulose synthesis during salt stress <sup>5</sup>, whereas Tau has  
258 emerged as a key regulator of stress-induced brain pathology in mice and oxidative stress in  
259 cultured fibroblasts <sup>31,32</sup>. Furthermore, similar to the tyrosine to alanine mutations in CC1,  
260 disease-related mutations in Tau cause distinct defects in microtubule organization <sup>33</sup>. While  
261 the typical PGGG-containing repeats of the Tau microtubule-binding domain (R1-R4) are not  
262 obvious from the CC1 sequence, the two proteins do contain four similarly spaced  
263 hydrophobic microtubule-binding regions (regions 1-4 in Fig. S4H). A sequence comparison

264 of these four regions reveals a surprisingly high number of identical or similar residues Fig.  
265 S4H, bottom), implying evolutionary convergence of the microtubule-binding mechanism.

266 While the microtubule-regulating mechanisms appear to be comparable between Tau  
267 and CC1 (Fig. 6), other features of the two proteins are clearly different. For example, Tau is  
268 a cytoplasmic protein with an N-terminal projection domain that regulates microtubule  
269 spacing<sup>34</sup>, whereas CC1 contains a putative transmembrane domain and is closely connected  
270 to the CSC<sup>5</sup>. The proteins are thus situated in different cellular contexts that will influence  
271 their modes of operation. Notably, the microtubule arrays have different design principles in  
272 animal and plant cells. The centrosome-coordinated microtubules in animal cells typically  
273 radiate from the cell center towards the periphery, while growing plant cells have a cortical  
274 microtubule array, with evenly distributed microtubules along the cell cortex<sup>2</sup>. We speculate  
275 that the differences in the protein domains and topologies of Tau and CC1 coincide with the  
276 microtubule array organization. CC1 is a core component of the CSC (Fig. 6), which is  
277 primarily localized on cortical microtubule bundles<sup>3</sup> and its movement is guided by cortical  
278 microtubules in plant interphase cells<sup>3</sup>. Hence, the CC1 proteins are superbly situated to  
279 modulate microtubule dynamics and bundling to optimize cellulose synthesis under different  
280 environmental conditions. Our results thus support striking similarities for how plant cells  
281 and neurons control microtubule bundling and dynamics in the context of the microtubule  
282 array organization. In this setting, the CC1 microtubule-binding motif that contains the two  
283 tyrosine residues essential for stress-stable microtubule array formation is most distal to the  
284 plasma membrane. Given the local environment of CC1, i.e. being part of the CSC and  
285 integral to the plasma membrane, this distal motif might be the most prominently exposed of  
286 the four microtubule-binding motifs and therefore also most prominent in the microtubule  
287 engagement. Engineering the microtubule-binding properties of this domain, perhaps by  
288 design principles of Tau, might improve cellulose synthesis and thus biomass production on  
289 salt-affected lands.

290

291

## 292 **References and Notes**

- 293 1. Roostalu, J. & Surrey, T. Microtubule nucleation: beyond the template. *Nat. Rev. Mol.*  
294 *Cell Biol.* **18**, 702–710 (2017).
- 295 2. Mach, J. Plant cortical microtubule arrays: recruitment mechanisms in common with  
296 centrosomes. *Plant Cell* **24**, 2 (2012).
- 297 3. Paredez, A. R., Somerville, C. R. & Ehrhardt, D. W. Visualization of cellulose synthase  
298 demonstrates functional association with microtubules. *Science* **312**, 1491–1495 (2006).
- 299 4. McFarlane, H. E., Döring, A. & Persson, S. The cell biology of cellulose synthesis.  
300 *Annu. Rev. Plant Biol.* **65**, 69–94 (2014).

- 301 5. Endler, A. *et al.* A Mechanism for Sustained Cellulose Synthesis during Salt Stress. *Cell*  
302 **162**, 1353–1364 (2015).
- 303 6. Ballatore, C., Lee, V. M.-Y. & Trojanowski, J. Q. Tau-mediated neurodegeneration in  
304 Alzheimer's disease and related disorders. *Nat. Rev. Neurosci.* **8**, 663–672 (2007).
- 305 7. Arendt, T., Stieler, J. T. & Holzer, M. Tau and tauopathies. *Brain Res. Bull.* **126**, 238–  
306 292 (2016).
- 307 8. Kellogg, E. H. *et al.* Near-atomic model of microtubule-tau interactions. *Science* **360**,  
308 1242–1246 (2018).
- 309 9. Drechsel, D. N., Hyman, A. A., Cobb, M. H. & Kirschner, M. W. Modulation of the  
310 dynamic instability of tubulin assembly by the microtubule-associated protein tau. *Mol.*  
311 *Biol. Cell* **3**, 1141–1154 (1992).
- 312 10. Hinrichs, M. H. *et al.* Tau protein diffuses along the microtubule lattice. *J. Biol. Chem.*  
313 **287**, 38559–38568 (2012).
- 314 11. Scott, C. W., Klika, A. B., Lo, M. M. S., Norris, T. E. & Caputo, C. B. Tau protein  
315 induces bundling of microtubules in vitro: Comparison of different tau isoforms and a  
316 tau protein fragment. *J. Neurosci. Res.* **33**, 19–29 (1992).
- 317 12. Drubin, D. G. & Kirschner, M. W. Tau protein function in living cells. *J. Cell Biol.* **103**,  
318 2739–2746 (1986).
- 319 13. Trojanowski, J. Q., Schuck, T., Schmidt, M. L. & Lee, V. M. Distribution of tau proteins  
320 in the normal human central and peripheral nervous system. *J. Histochem. Cytochem.*  
321 **37**, 209–215 (1989).
- 322 14. Mucke, L. Neuroscience: Alzheimer's disease. *Nature* **461**, 895–897 (2009).
- 323 15. Gardiner, J., Overall, R. & Marc, J. Distant plant homologues: don't throw out the baby.  
324 *Trends Plant Sci.* **17**, 126–128 (2012).
- 325 16. Gardiner, J. The evolution and diversification of plant microtubule-associated proteins.



- 326 *Plant J.* **75**, 219–229 (2013).
- 327 17. Rappsilber, J. The beginning of a beautiful friendship: Cross-linking/mass spectrometry  
328 and modelling of proteins and multi-protein complexes. *J. Struct. Biol.* **173**, 530–540  
329 (2011).
- 330 18. Kadavath, H. *et al.* Tau stabilizes microtubules by binding at the interface between  
331 tubulin heterodimers. *Proc. Natl. Acad. Sci. U. S. A.* **112**, 7501–7506 (2015).
- 332 19. Gigant, B. *et al.* Structural basis for the regulation of tubulin by vinblastine. *Nature* **435**,  
333 519–522 (2005).
- 334 20. Ravelli, R. B. G. *et al.* Insight into tubulin regulation from a complex with colchicine  
335 and a stathmin-like domain. *Nature* **428**, 198–202 (2004).
- 336 21. Reddy, V., Lyman, E., Hu, M. & Hainfeld, J. 5 nm Gold-Ni-NTA binds His tags.  
337 *MICROSCOPY AND MICROANALYSIS-NEW YORK*- **11**, 1118CD (2005).
- 338 22. Gell, C. *et al.* Microtubule dynamics reconstituted in vitro and imaged by single-  
339 molecule fluorescence microscopy. *Methods Cell Biol.* **95**, 221–245 (2010).
- 340 23. Mukrasch, M. D. *et al.* Structural polymorphism of 441-residue tau at single residue  
341 resolution. *PLoS Biol.* **7**, e34 (2009).
- 342 24. Sampathkumar, A. *et al.* Patterning and lifetime of plasma membrane-localized cellulose  
343 synthase is dependent on actin organization in Arabidopsis interphase cells. *Plant*  
344 *Physiol.* **162**, 675–688 (2013).
- 345 25. Gutierrez, R., Lindeboom, J. J., Paredez, A. R., Emons, A. M. C. & Ehrhardt, D. W.  
346 Arabidopsis cortical microtubules position cellulose synthase delivery to the plasma  
347 membrane and interact with cellulose synthase trafficking compartments. *Nat. Cell Biol.*  
348 **11**, 797–806 (2009).
- 349 26. Cramer, G. R., Urano, K., Delrot, S., Pezzotti, M. & Shinozaki, K. Effects of abiotic  
350 stress on plants: a systems biology perspective. *BMC Plant Biol.* **11**, 163 (2011).

- 351 27. Shrivastava, P. & Kumar, R. Soil salinity: A serious environmental issue and plant  
352 growth promoting bacteria as one of the tools for its alleviation. *Saudi J. Biol. Sci.* **22**,  
353 123–131 (2015).
- 354 28. Munns, R. & Tester, M. Mechanisms of salinity tolerance. *Annu. Rev. Plant Biol.* **59**,  
355 651–681 (2008).
- 356 29. Fauquant, C. *et al.* Systematic identification of tubulin-interacting fragments of the  
357 microtubule-associated protein Tau leads to a highly efficient promoter of microtubule  
358 assembly. *J. Biol. Chem.* **286**, 33358–33368 (2011).
- 359 30. Gigant, B. *et al.* Mechanism of Tau-promoted microtubule assembly as probed by NMR  
360 spectroscopy. *J. Am. Chem. Soc.* **136**, 12615–12623 (2014).
- 361 31. Lopes, S. *et al.* Tau protein is essential for stress-induced brain pathology. *Proc. Natl.*  
362 *Acad. Sci. U. S. A.* **113**, E3755–63 (2016).
- 363 32. Ibáñez-Salazar, A. *et al.* Oxidative Stress Modifies the Levels and Phosphorylation State  
364 of Tau Protein in Human Fibroblasts. *Front. Neurosci.* **11**, 495 (2017).
- 365 33. Prezel, E. *et al.* Tau can switch microtubule network organizations: from random  
366 networks to dynamic and stable bundles. *Mol. Biol. Cell* **29**, 154–165 (2018).
- 367 34. Chen, J., Kanai, Y., Cowan, N. J. & Hirokawa, N. Projection domains of MAP2 and tau  
368 determine spacings between microtubules in dendrites and axons. *Nature* **360**, 674–677  
369 (1992).
- 370 35. Zhang, X. *et al.* Heat-shock response transcriptional program enables high-yield and  
371 high-quality recombinant protein production in *Escherichia coli*. *ACS Chem. Biol.* **9**,  
372 1945–1949 (2014).
- 373 36. Wishart, D. S. & Sykes, B. D. The <sup>13</sup>C chemical-shift index: a simple method for the  
374 identification of protein secondary structure using <sup>13</sup>C chemical-shift data. *J. Biomol.*  
375 *NMR* **4**, 171–180 (1994).

## 376 **Acknowledgements**

377 Live cell imaging was performed with equipment maintained by the Center for Microscopy  
378 and Image Analysis (University of Zurich) and Scientific Center for Optical and Electron  
379 Microscopy (ScopeM, ETH Zurich). We thank Martina Leidert and Natalja Erdmann for help  
380 with protein expression and purification. We also thank the Diez group, especially Felix  
381 Ruhnnow, (B CUBE Center for Molecular Bioengineering, Dresden) for assistance with  
382 microtubule imaging and *in vitro* assays. The helper plasmid pBAD- $\sigma$ 32 (I54N) was a gift  
383 from Jeffery Kelly<sup>35</sup>; Addgene plasmid # 59982), pETM11 was kindly supplied by EMBL  
384 Protein Production facility (Heidelberg Germany). We thank the Biological Optical  
385 Microscopy Platform, the Melbourne Advanced Microscopy Facility, and the Mass  
386 Spectrometry and Proteomics Facility (School of Biosciences and Bio21) at the University of  
387 Melbourne. **Funding:** S.P. was supported by an ARC Discovery grant (DP150103495), a  
388 Hermon-Slade Grant (Persson HSF 15/4) and a Future Fellowship grant (FT160100218).  
389 J.L.H. was supported by an ARC Future Fellowship (FT130101165). H.E.M. was supported  
390 by an ARC DECRA (DE170100054). C.S.R. and C.K. were supported by ETHZ and a SNF  
391 grant (2-77212-15). C.K. was supported by a Peter und Traudl Engelhorn-Stiftung  
392 fellowship. R.S. received Computational Biology Research Initiative and Early Career  
393 Research Grants from the University of Melbourne. **Author contributions:** C.K., A.W.,  
394 R.S., H.E.M., A.D., B.J.v.R., J.H., C.S.R., H.O. and S.P. designed the research. C.K., A.W.,  
395 R.S., H.E.M., A.D., M.L., G.A.K., N.C., P.S., F.S. and K.F. performed the research. C.K.,  
396 A.W., R.S., H.E.M., J.H. and S.P. analyzed data. C.K., A.W., C.S.R., H.O. and S.P. wrote the  
397 article. C.K. and A.W. share equal first authorship. **Competing interests:** The authors  
398 declare no competing interests. **Data and materials availability:** All data is available in the  
399 manuscript or the supplementary materials.

400

## 401 **Supplementary Materials:**

402 Materials and Methods

403 Figure S1 – S6, Table S1

404 Movies S1 and S2

405 References (1 –39)

406

407

408

409

410

411

412

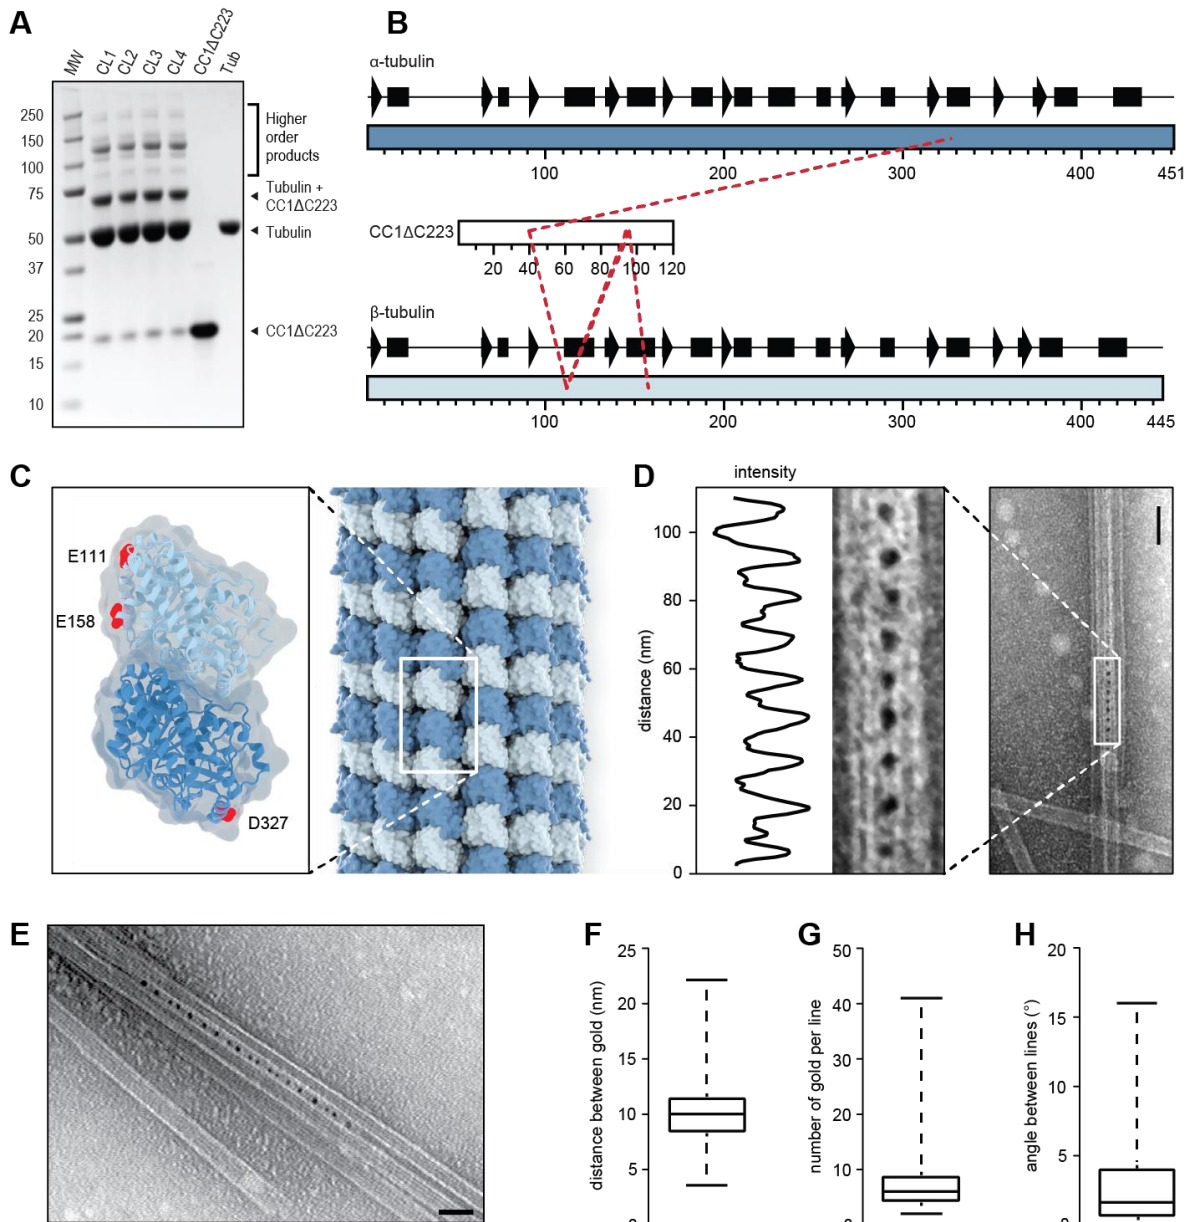

413

414 **Figure 1. The N-terminus of CC1 binds sites on both  $\alpha$ - and  $\beta$ -Tubulin and cross-links**  
415 **microtubules.**

416 **A.** SDS-Page of EDC-induced cross-linking of 6xHis-CC1ΔC223 (16 kDa) and tubulin  
417 dimers (2 x 55 kDa). Arrowheads depict position of relevant protein bands. MW = molecular  
418 weight marker, CL1-4 = cross-linking reaction 1-4. Higher order cross-linking products  
419 represent cross-links between e.g. tubulin + 2 x CC1ΔC223 (87 kDa), tubulin dimers (110  
420 kDa), tubulin dimers + CC1ΔC223 (126 kDa), tubulin dimers + 2 x CC1ΔC223 (142 kDa).

421 **B.** Schematic views of the secondary structures of  $\alpha$ - and  $\beta$ -tubulin, and the CC1ΔC223  
422 sequence. Dashed lines depict detected cross-linking positions of CC1ΔC223 and  $\alpha$ - or  $\beta$ -  
423 tubulin.

424 **C.** Projection of detected cross-links onto an  $\alpha/\beta$ -tubulin dimer. Dark blue =  $\alpha$ -tubulin; Light  
425 blue =  $\beta$ -tubulin; Sites for cross-linked amino acids are marked in red.

426 **D.** Representative TEM image of CC1 $\Delta$ C223 distribution along negatively-stained, taxol-  
427 stabilized microtubules polymerized in the presence of 6xHis-CC1 $\Delta$ C223. CC1 $\Delta$ C223  
428 protein is visualized by a 5 nm gold-conjugated Ni-NTA tag that recognizes 6xHis-tagged  
429 proteins. A transect was taken along rows of gold particles, and dips in the light intensity  
430 along the transect correspond to gold particle centers. Note the even distribution of the  
431 electron-dense gold particles in between neighboring microtubules. Scale bar = 50 nm.

432 **E.** CC1 $\Delta$ C223 distribution along negatively-stained, taxol-stabilized microtubules  
433 polymerized in the presence of 6xHis-CC1 $\Delta$ C223. CC1 $\Delta$ C223 can form a zipper-like pattern  
434 that links microtubules. Scale bar = 100 nm.

435 **F.** Quantification of the distance between individual gold particles as shown in **D** and **E** (box  
436 plot: Center lines show the medians; box limits indicate the 25th and 75th percentiles;  
437 whiskers extend to the minimum and maximum).

438 **G** and **H.** Quantification of number of gold labels per row (**G**) and the angle between  
439 adjacent gold-labeled rows (**H**) from images as those in **D** and **E** (box plots: Centerlines show  
440 the medians; box limits indicate the 25th and 75th percentiles; whiskers extend to the  
441 minimum and maximum).

442

443

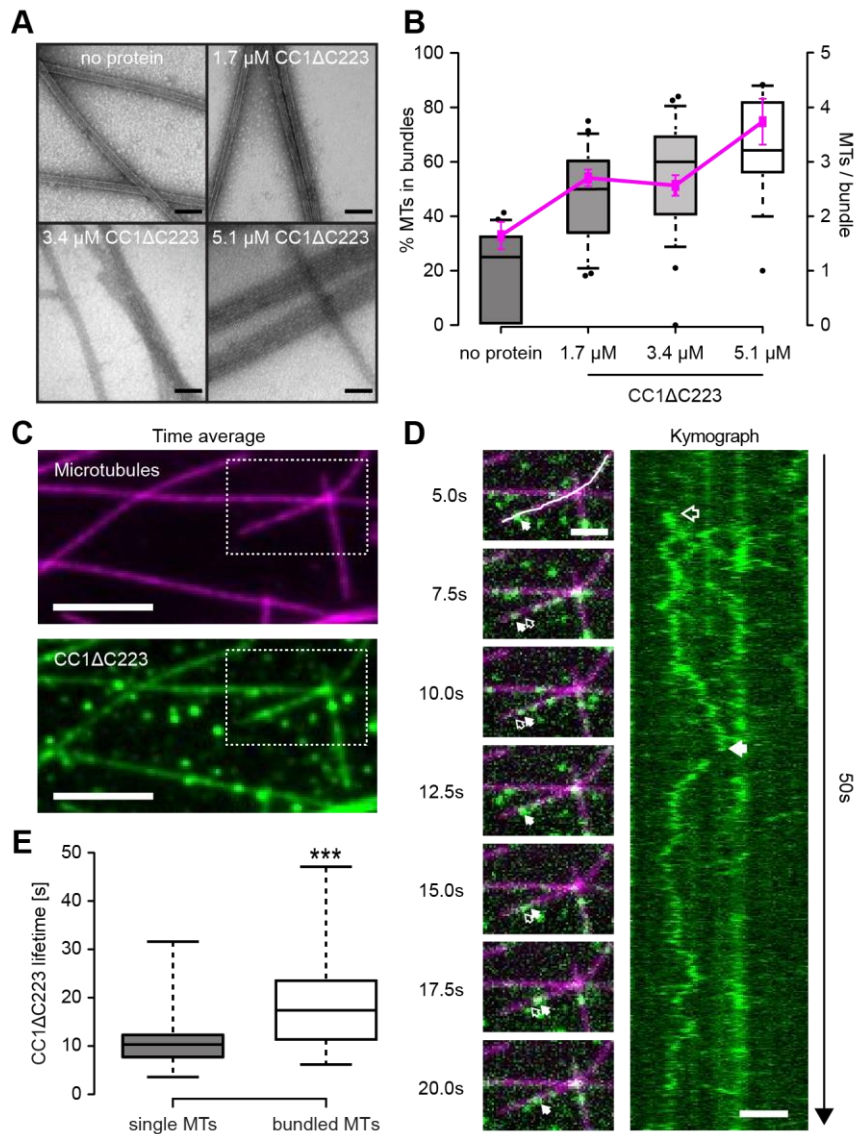

444

445 **Figure 2. The N-terminus of CC1 induces microtubule bundling and can diffuse**  
446 **the microtubule lattice.**

447 **A.** Transmission electron microscopy (TEM) of negatively-stained taxol-stabilized  
448 microtubules after addition of increasing levels of 6xHis-CC1 $\Delta$ C223 during microtubule  
449 polymerization. Note that it is very difficult to discern individual microtubules in the  
450 microtubule bundles after addition of  $\sim 3 \mu$ M of CC1 $\Delta$ C223. Scale bars = 100 nm.

451 **B.** Quantification of the proportion of microtubules in bundles (left y-axis, box plots: Center  
452 lines show the medians; box limits indicate the 25th and 75th percentiles; whiskers extend to  
453 the 10th and 90th percentiles, outliers are represented by dots) and number of  
454 microtubules/bundle (right y-axis, magenta line: mean  $\pm$  SEM) with increasing  
455 concentration of H6xis-CC1 $\Delta$ C223 (quantified from images such as those in A).

456 **C.** CF488A-labeled 6xHis-CC1 $\Delta$ C223 proteins (green) associated with surface-bound  
457 microtubules (magenta) *in vitro*. Scale bar = 5  $\mu$ m.

458 **D.** Time-series images (left panel) of CF488-labeled 6xHis-CC1 $\Delta$ C223 (green) diffusing  
459 along microtubules (magenta). Filled arrow = position in current frame, empty arrow =  
460 position in previous frame. Scale bar = 2  $\mu$ m. Representative kymograph (right panel) along  
461 solid line in left panel (top) showing diffusion of 6xHis-CC1 $\Delta$ C223 foci. Scale bar = 2  $\mu$ m.

462 **E.** 6xHis-CC1ΔC223 lifetime on single versus bundled microtubules (box plots: Center lines  
463 show the medians; box limits indicate the 25th and 75th percentiles; whiskers extend to the  
464 minimum and maximum), n = 60 single and 37 bundled microtubules, \*\*\* p-value < 0.001,  
465 Welch's unpaired *t*-test).

466  
467  
468  
469  
470  
471  
472  
473  
474  
475  
476  
477  
478  
479  
480  
481  
482  
483  
484  
485  
486  
487  
488  
489  
490  
491  
492  
493  
494  
495  
496  
497  
498  
499  
500  
501

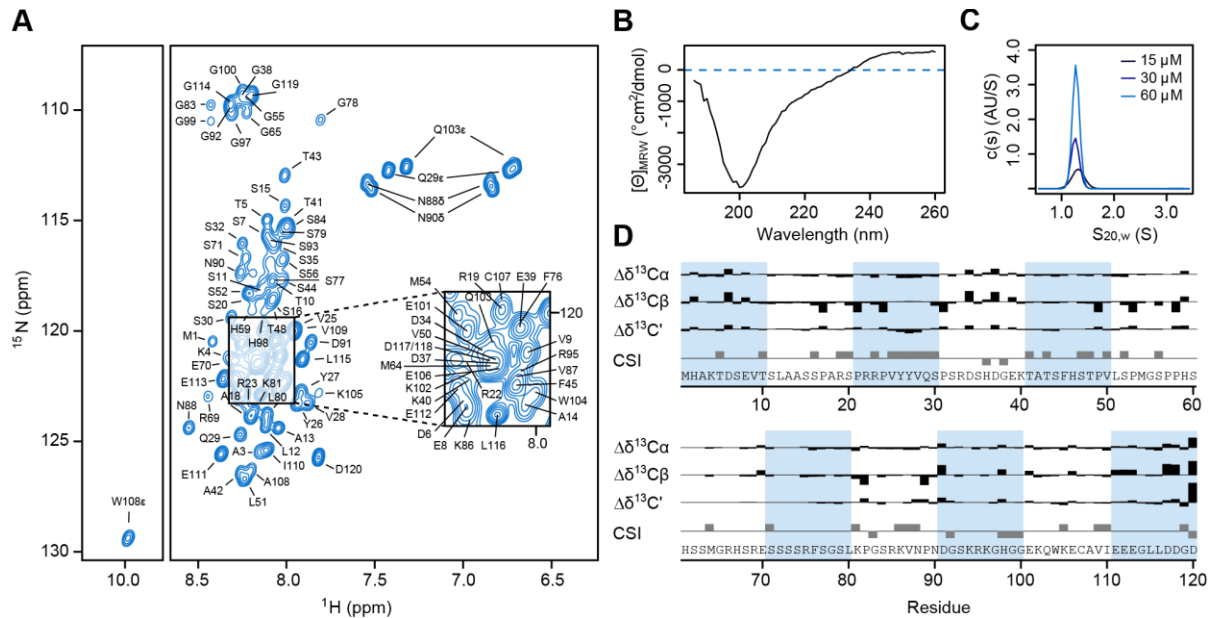

502

503 **Figure 3. NMR scale protein production and structural characteristics of the CC1 N-**  
 504 **terminus.**

505 **A.** Assigned  $^1\text{H}$ - $^{15}\text{N}$  HSQC spectrum of  $^{15}\text{N}$ -labeled CC1 $\Delta$ C223 in solution. The low signal  
 506 dispersion in the  $^1\text{H}$  dimension is characteristic of an intrinsically disordered protein.

507 **B.** Circular dichroism (CD) spectrum of 6xHis-CC1 $\Delta$ C223 in solution supporting lack of  
 508 clear structures in the protein.

509 **C.** Analytical ultracentrifugation at three different CC1 $\Delta$ C223 concentrations showed a single  
 510 size population at the approximate molecular weight of monomeric CC1 $\Delta$ C223. The  
 511 frictional coefficient of 1.7 is characteristic for elongated protein shapes.

512 **D.**  $\Delta\delta^{13}\text{C}\alpha$ ,  $\Delta\delta^{13}\text{C}\beta$  and  $\Delta\delta^{13}\text{C}'$  values and chemical shift indices (CSI) for CC1 $\Delta$ C223 <sup>36</sup>.  
 513 Experimental  $\text{C}\alpha$ ,  $\text{C}\beta$  and  $\text{C}'$  chemical shifts were subtracted from the respective random coil  
 514 values for each amino acid type.

515



516

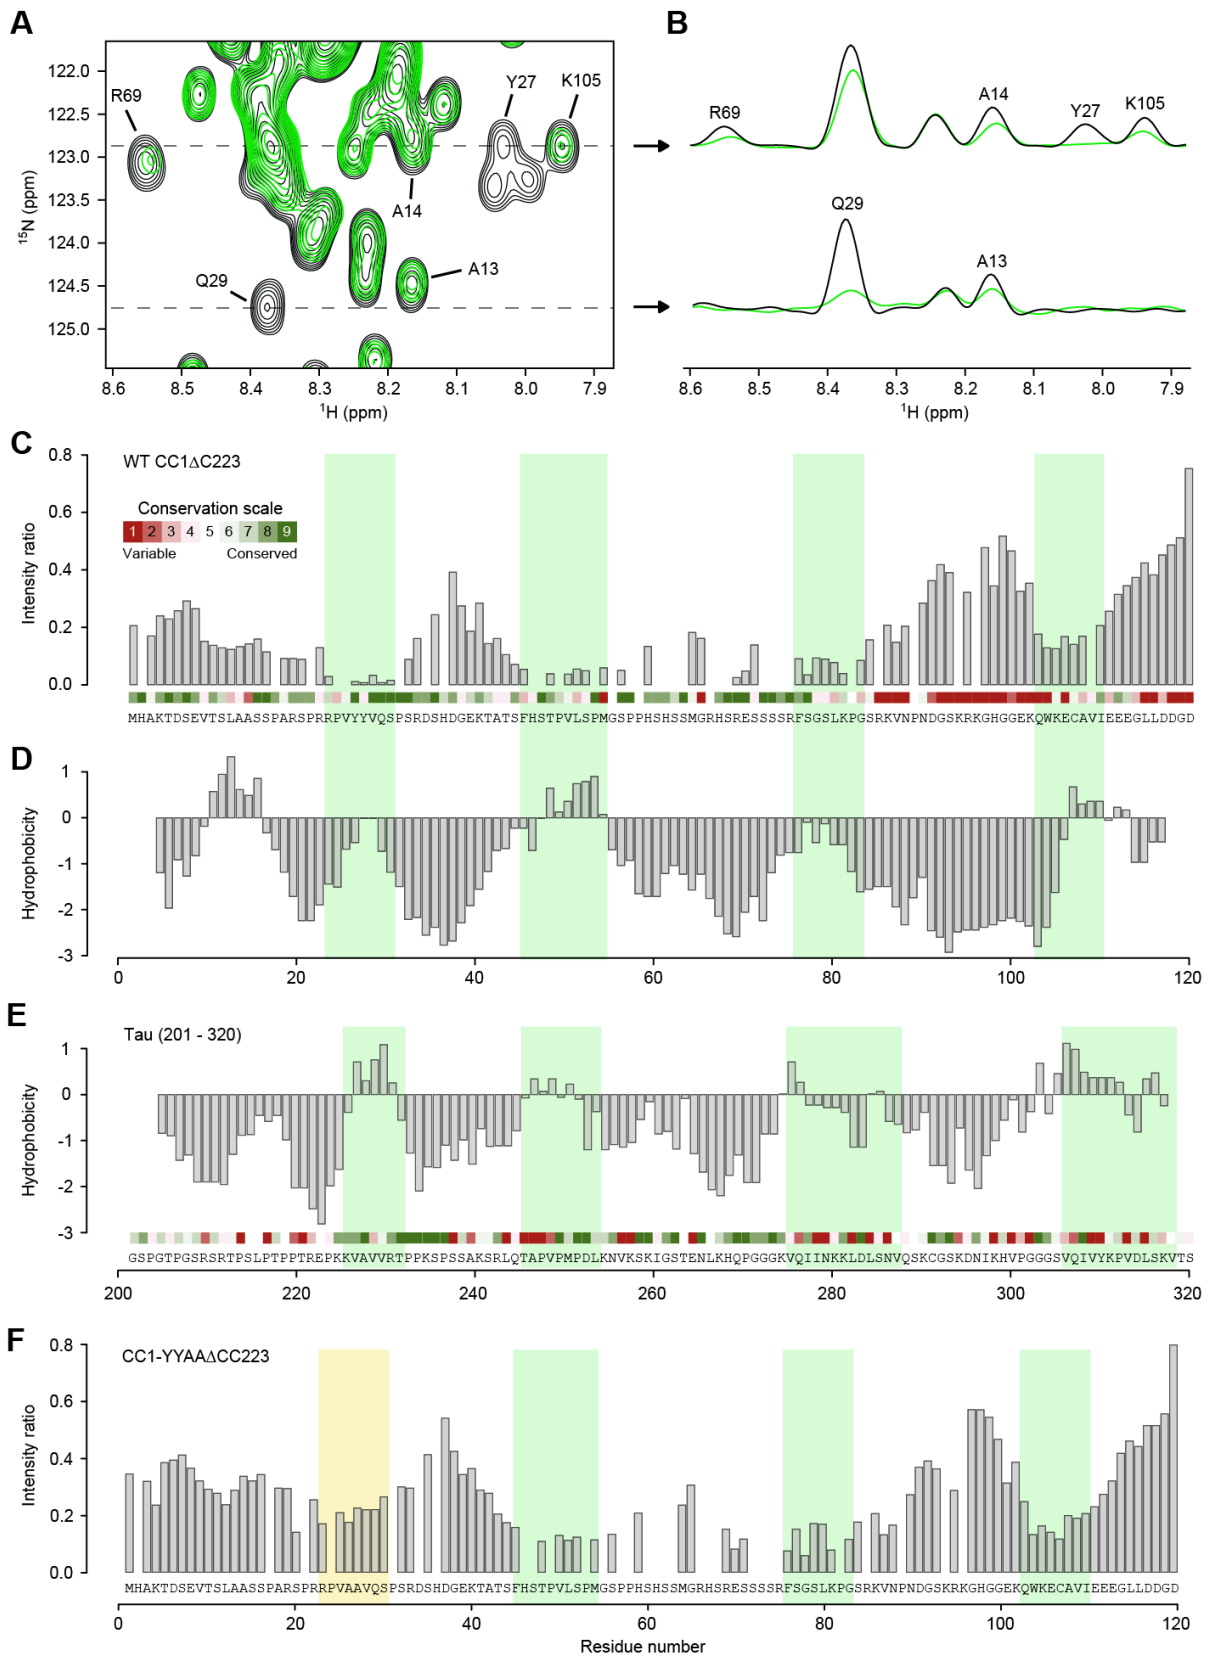

517

518

519

**Figure 4. The N-terminus of CC1 binds to paclitaxel-stabilized microtubules via short, hydrophobic and conserved regions.**

- 520 **A.**  $^1\text{H}$ - $^{15}\text{N}$  HSQC spectrum of free CC1 $\Delta$ C223 (black) and in the presence of equimolar  
521 paclitaxel-stabilized microtubules (green). Selected residues are labeled.
- 522 **B.**  $F_2$ -cross sections, showing  $^1\text{H}$ -signals, taken along dotted lines in (A) at  $^{15}\text{N}$  frequencies  
523 122.9 and 124.7 ppm.
- 524 **C.** Intensity ratio of free CC1 $\Delta$ C223 HNCA signals and in complex with microtubules.  
525 Minima are highlighted with green bars. Site-specific evolutionary conservation calculated by  
526 CONSURF is plotted above the sequence in a color code (green = conserved, red =  
527 unconserved).
- 528 **D.** Hydrophobicity scores of CC1 $\Delta$ C223 according to the Kyte-Doolittle scale, calculated in a  
529 5-residue window.
- 530 **E.** Hydrophobicity scores of Tau(201-320) according to the Kyte-Doolittle scale, calculated  
531 in a 5 residue window. Sequence conservation is plotted above the sequence like in (C).  
532 Green bars highlight the interacting regions of Tau with microtubules as in <sup>23</sup>.
- 533 **F.** Intensity ratio of free CC1YYAA $\Delta$ C223 HNCA signals and in complex with  
534 microtubules. Mutated N-terminal region highlighted with yellow bar.

535

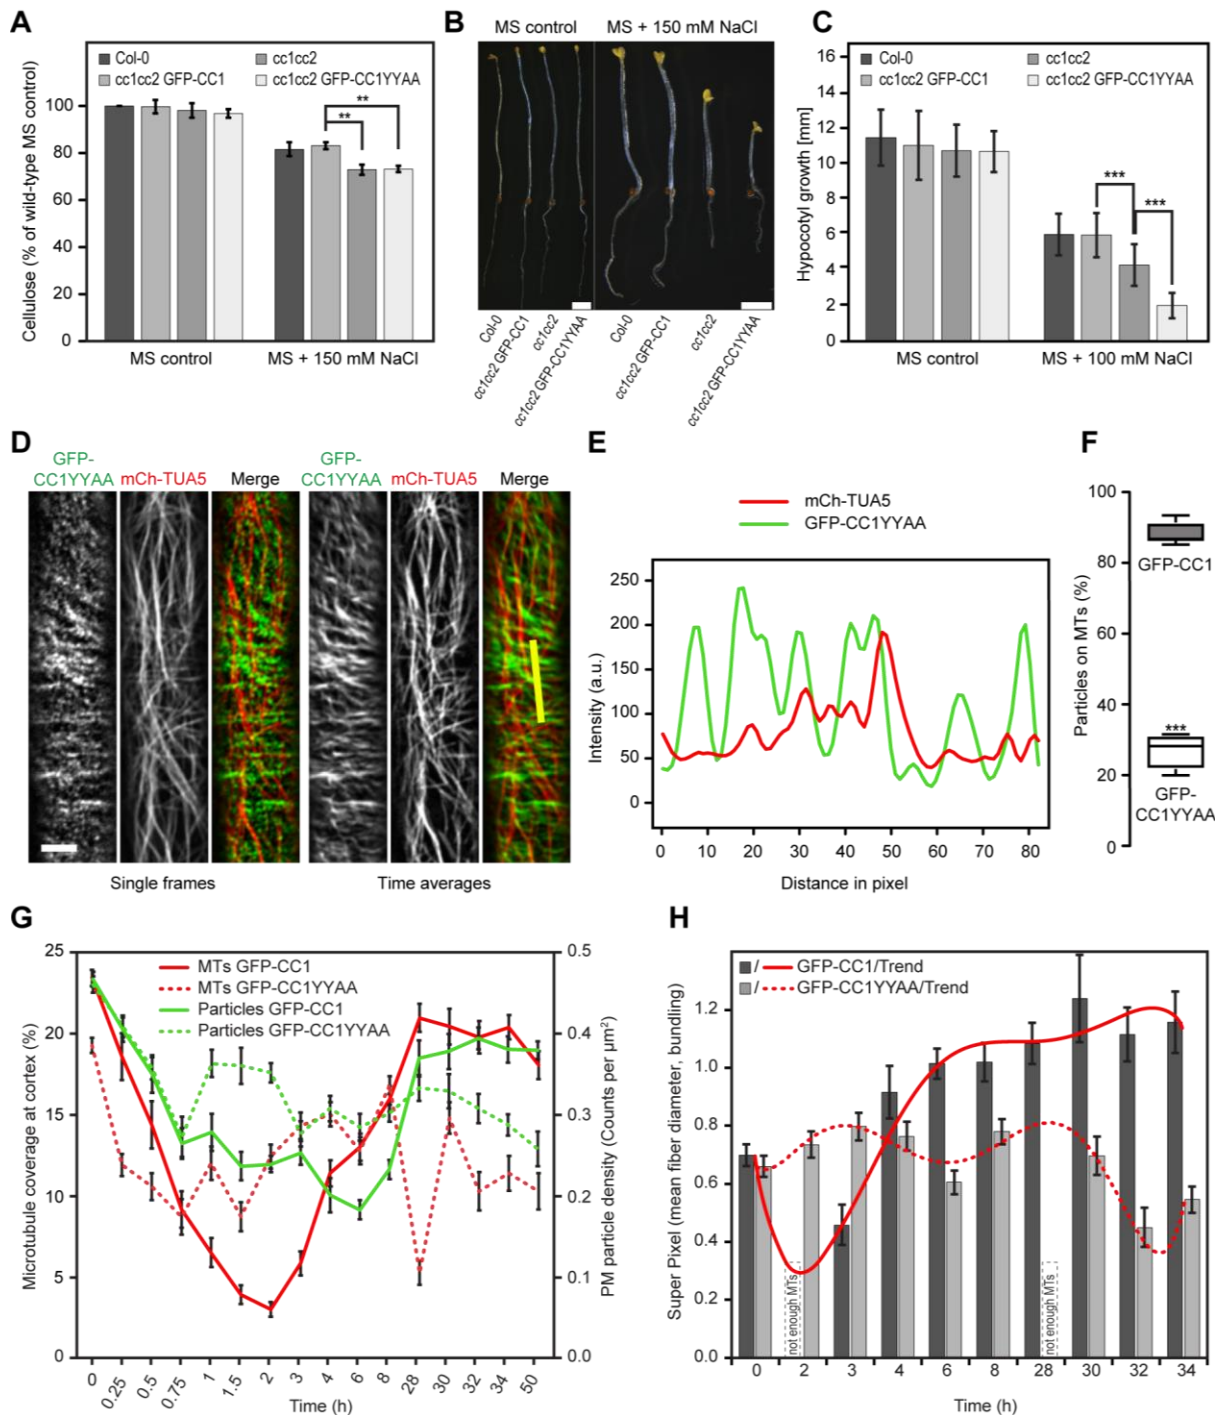

536

537

538 **Figure 5. Mutations in the first microtubule binding region of CC1 impair salt tolerance**  
 539 **of plants because of mis-regulated microtubule organization upon salt stress.**

540 **A.** Cellulose levels in seedlings grown as in **(B)**. Values are means  $\pm$  SD expressed as %  
 541 cellulose of wild-type seedlings grown on MS control media. N = 3 biological replicates with  
 542 3 technical replicates each. Unpaired *t*-test; \*\* p-value  $\leq$  0.01.

543 **B.** Seedlings germinated and grown for two days on MS plates and then transferred to either  
 544 MS control plates or MS plates supplemented with 150 mM NaCl and grown for additional 5

545 days. Scale bar = 2 mm. Please be aware that the images were stitched with Leica LAS X  
546 Life Science software.

547 **C.** Quantification of hypocotyl elongation of seedlings grown on MS plates for three days  
548 and then transferred to either MS control plates or MS plates supplemented with 100 mM  
549 NaCl and grown for additional 4 days. Values are mean +/- SD, N = 30 seedlings, 10  
550 seedlings each per three independent experiments. Unpaired *t*-test; \*\*\* p-value  $\leq 0.001$ .

551 **D.** GFP-CC1YYAA and mCh-TUA5 in dual-labeled three-day-old *cc1cc2* etiolated  
552 hypocotyls (left panels; single frame, right panels; time average projections). Scale bars = 5  
553  $\mu\text{m}$ .

554 **E.** Fluorescence intensity plot of GFP-CC1YYAA and tdT-CESA6 from transect in (**D**) along  
555 the depicted yellow line. Note that the GFP signal does not substantially correlate with the  
556 mCherry signal.

557 **F.** Quantification of GFP-CC1 and GFP-CC1YYAA fluorescent foci on cortical microtubules  
558 in a 50x50 pixel area of five individual time-lapse images, N = 5 cells from 5 seedling and 3  
559 independent experiments (box plots: Center lines show the medians; box limits indicate the  
560 25th and 75th percentiles; whiskers extend to the minimum and maximum). Unpaired *t*-test;  
561 \*\*\* p-value  $\leq 0.001$ .

562 **G.** Quantification of microtubule and GFP-CC (GFP-CC1 or GFP-CC1YYAA) coverage at  
563 the cell cortex and plasma membrane, respectively, after exposure of *cc1cc2* seedlings to 200  
564 mM NaCl as in an experiment shown in figure **S6F**. Time indicates time after salt exposure.  
565 Values are mean +/- SEM, n = 27 cells from 3 seedlings per time point and 3 independent  
566 experiments. Two-way ANOVA analysis of microtubule coverage;  $p \leq 0.001$  (genotype),  $p \leq$   
567  $0.001$  (time),  $p \leq 0.001$  (genotype x time). Two-way ANOVA analysis of GFP-CC protein  
568 density;  $p \leq 0.01$  (genotype),  $p \leq 0.001$  (time),  $p \leq 0.001$  (genotype x time).

569 **H.** Quantification of microtubule bundling after exposure of *cc1cc2* GFP-CC1 /GFP-  
570 CC1YYAA seedlings to 200 mM NaCl as in an experiment shown in figure **S6F**. The salt  
571 adjusted microtubule array in GFPCC1 seedlings shows increased bundling after exposure to  
572 salt while the array GFPCC1YYAA seedlings does not. Values are mean +/- SEM, n = 27  
573 cells from 3 seedlings per time point and 3 independent experiments. Two-way ANOVA  
574 analysis of microtubule bundling (excluding T2 and T28);  $p \leq 0.001$  (genotype),  $p \leq 0.001$   
575 (time),  $p \leq 0.001$  (genotype x time).

576

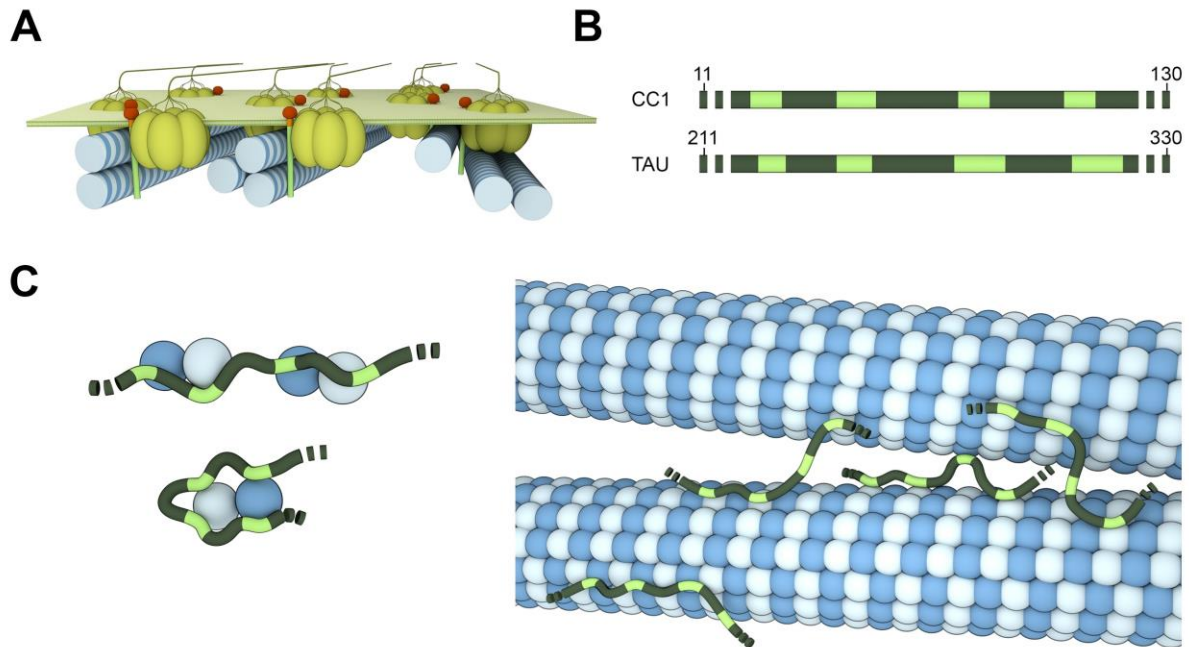

577

578

579

580 **Figure 6. Cartoon Overview of the CC1-microtubule interaction and its similarity to**  
581 **Tau**

582 **A.** CC1 localization in its cellular context as part of the cellulose synthase complex (CSC).  
583 CC1 interacts with one or several microtubules while the CSC migrates on cortical  
584 microtubules during cellulose production. CC1 regulates microtubule array organization at  
585 the same time through its cytosolic N-terminus by e.g. bundling and dynamic modifications.

586 **B.** Microtubule interacting CC1 N-terminus and the corresponding domain of Tau. Both  
587 microtubule binding domains show remarkable similarities: four similarly spaced,  
588 hydrophobic microtubule binding motifs (highlighted in green) that are spaced by flexible,  
589 hydrophilic linker regions. The four hydrophobic sites also share sequence similarities (see  
590 Fig. S4H).

591 **C** The dynamic nature of the CC1 $\Delta$ C223 and Tau binding behaviour suggests that both might  
592 be able to bind multiple distinct tubulin dimers *via* their individual binding motifs, thereby  
593 increasing the local tubulin concentration, connecting and stabilizing protofilaments or  
594 bundling microtubules.

595
